# Supplementary material for: Genetic Interactions Between the Meiosis-Specific Cohesin Components, STAG3, REC8, and RAD21L
Source: PubMed Central journal article supplement (PMC4889667; doi:10.1534/g3.116.029462), 2016-04-16
Supplement: supp_g3.116.029462_TableS1.pdf [file supp_g3.116.029462_TableS1.pdf]

Table S1. Antibodies used for immunofluorescence microscopy analyses.

| Antigen         | Host   | Source                  | Catalogue number | Dilution ratio |
|-----------------|--------|-------------------------|------------------|----------------|
| CREST/ACA (CEN) | Human  | Antibodies Incorporated | 15-235           | 1:50           |
| RAD21           | Rabbit | Abcam                   | ab154769         | 1:250          |
| RAD21L          | Rabbit | Alberto Pendas          | NA               | 1:250          |
| REC8            | Rabbit | Karen Schindler         | NA               | 1:500          |
| SMC1 $\alpha$   | Rabbit | Rolf Jessberger         | NA               | 1:100          |
| SMC1 $\beta$    | Rabbit | Rolf Jessberger         | NA               | 1:250          |
| SMC3            | Rabbit | Abcam                   | ab9263           | 1:250          |
| STAG1           | Goat   | Abcam                   | ab4457           | 1:25           |
| STAG2           | Goat   | Abcam                   | ab4463           | 1:25           |
| SYCP1           | Rabbit | Novus Biologicals       | NB300-229        | 1:500          |
| SYCP3           | Rat    | Mary Ann Handel         | NA               | 1:500          |
| SYCP3           | Mouse  | Santa Cruz              | Sc-74569         | 1:50           |
| $\gamma$ H2AX   | Mouse  | Millipore               | 05-636           | 1:500          |
